# Supplementary material for: Balancing Speed and Accuracy in Cardiac Magnetic Resonance Function Post-Processing: Comparing 2 Levels of Automation in 3 Vendors to Manual Assessment
Source: MDPI journal article supplement (doi:10.3390/diagnostics11101758), 2021-09-24
Supplement: s1 [file s1]

**Table S1.** Reproducibility of the manually contour-traced validation dataset.

| Parameter          | Intra-observer         |       |    | Inter-observer         |       |    |
|--------------------|------------------------|-------|----|------------------------|-------|----|
|                    | Mn-D. ( $\pm 1.96SD$ ) | ICC   | MD | Mn-D. ( $\pm 1.96SD$ ) | ICC   | MD |
| <b>LVEDV (mL)</b>  | -0.2 ( $\pm 5.6$ )     | 0.988 | 3  | -1.0 ( $\pm 5.0$ )     | 0.989 | 3  |
| <b>LVEF (%)</b>    | -0.5 ( $\pm 1.6$ )     | 0.925 | 4  | -0.4 ( $\pm 1.5$ )     | 0.940 | 4  |
| <b>LV mass (g)</b> | 0.0 ( $\pm 5.6$ )      | 0.993 | 5  | 0.3 ( $\pm 7.5$ )      | 0.989 | 6  |
| <b>RVEDV (mL)</b>  | 0.6 ( $\pm 6.5$ )      | 0.987 | 4  | 0.6 ( $\pm 8.7$ )      | 0.979 | 4  |
| <b>RVEF (%)</b>    | -0.2 ( $\pm 1.2$ )     | 0.987 | 3  | -0.1 ( $\pm 2.3$ )     | 0.963 | 4  |

Mn-D.: mean difference; SD: standard deviation; ICC: intraclass correlation coefficient; MD: maximum disagreement percentage; LV: left ventricle; EDV: end-diastolic volume; EF: ejection fraction; RV: right ventricle.

**Table S2.** Reproducibility of repeated Level 1 and phase 1 of Level 2 automated post-processing.

| Parameter          | Vendor 1               |       | Vendor 2               |       | Vendor 3               |       |
|--------------------|------------------------|-------|------------------------|-------|------------------------|-------|
|                    | Mn-D. ( $\pm 1.96SD$ ) | ICC   | Mn-D. ( $\pm 1.96SD$ ) | ICC   | Mn-D. ( $\pm 1.96SD$ ) | ICC   |
|                    | Level 1                |       |                        |       |                        |       |
| LVEDV (mL)         | -0.3 ( $\pm 1.2$ )     | 1.000 | 1.4 ( $\pm 4.0$ )      | 0.999 | -0.5 ( $\pm 2.3$ )     | 1.000 |
| LVEF (%)           | 0.0 ( $\pm 0.0$ )      | 1.000 | -0.1 ( $\pm 1.6$ )     | 0.974 | -0.3 ( $\pm 0.8$ )     | 0.999 |
| LV mass (g)        | -0.9 ( $\pm 4.2$ )     | 0.998 | 0.2 ( $\pm 1.2$ )      | 1.000 | -0.2 ( $\pm 0.7$ )     | 1.000 |
| RVEDV (mL)         | -0.5 ( $\pm 2.0$ )     | 1.000 | 0.0 ( $\pm 0.0$ )      | 1.000 | -                      | -     |
| RVEF (%)           | 0.0 ( $\pm 0.0$ )      | 1.000 | 0.0 ( $\pm 0.0$ )      | 1.000 | -                      | -     |
| Phase 1 of Level 2 |                        |       |                        |       |                        |       |
| LVEDV (mL)         | -1.2 ( $\pm 1.7$ )     | 0.999 | 0.6 ( $\pm 2.5$ )      | 1.000 | -0.4 ( $\pm 3.0$ )     | 0.999 |
| LVEF (%)           | 0.2 ( $\pm 0.4$ )      | 0.999 | -0.0 ( $\pm 0.9$ )     | 0.999 | -0.0 ( $\pm 0.3$ )     | 1.000 |
| LV mass (g)        | 0.7 ( $\pm 2.8$ )      | 0.999 | -0.5 ( $\pm 2.6$ )     | 0.999 | -0.5 ( $\pm 2.8$ )     | 0.998 |
| RVEDV (mL)         | -0.4 ( $\pm 3.1$ )     | 1.000 | 1.2 ( $\pm 3.5$ )      | 0.999 | -                      | -     |
| RVEF (%)           | 0.6 ( $\pm 2.0$ )      | 0.949 | 0.3 ( $\pm 0.6$ )      | 0.998 | -                      | -     |

Mn-D.: mean difference; SD: standard deviation; ICC: intraclass correlation coefficient; LV: left ventricle; EDV: end-diastolic volume; EF: ejection fraction; RV: right ventricle.

**Table S3.** Comparison of results between Level 1, phase 1 of Level 2 automated, and gold standard manual tracing.

| Parameter          | Vendor 1               |                | Vendor 2               |                | Vendor 3               |                |
|--------------------|------------------------|----------------|------------------------|----------------|------------------------|----------------|
|                    | Mn-D. ( $\pm 1.96SD$ ) | R <sup>2</sup> | Mn-D. ( $\pm 1.96SD$ ) | R <sup>2</sup> | Mn-D. ( $\pm 1.96SD$ ) | R <sup>2</sup> |
|                    | Level 1                |                |                        |                |                        |                |
| LVEDV (mL)         | -11 ( $\pm 21$ )       | 0.91           | 31 ( $\pm 33$ )        | 0.83           | -4 ( $\pm 29$ )        | 0.83           |
| LVEF (%)           | 4 ( $\pm 8$ )          | 0.53           | -5 ( $\pm 16$ )        | 0.12           | -4 ( $\pm 14$ )        | 0.21           |
| LV mass (g)        | 26 ( $\pm 20$ )        | 0.86           | 24 ( $\pm 45$ )        | 0.46           | 2 ( $\pm 43$ )         | 0.43           |
| RVEDV (mL)         | -29 ( $\pm 45$ )       | 0.62           | -60 ( $\pm 72$ )       | 0.27           | -                      | -              |
| RVEF (%)           | -1 ( $\pm 13$ )        | 0.17           | 6 ( $\pm 27$ )         | 0.02           | -                      | -              |
| Phase 1 of Level 2 |                        |                |                        |                |                        |                |
| LVEDV (mL)         | -13 ( $\pm 10$ )       | 0.98           | 25 ( $\pm 26$ )        | 0.91           | -16 ( $\pm 19$ )       | 0.93           |
| LVEF (%)           | 5 ( $\pm 6$ )          | 0.72           | -0 ( $\pm 15$ )        | 0.21           | 2 ( $\pm 10$ )         | 0.41           |
| LV mass (g)        | 23 ( $\pm 15$ )        | 0.93           | 18 ( $\pm 32$ )        | 0.68           | -3 ( $\pm 41$ )        | 0.45           |
| RVEDV (mL)         | -18 ( $\pm 13$ )       | 0.97           | -31 ( $\pm 43$ )       | 0.66           | -                      | -              |
| RVEF (%)           | 6 ( $\pm 5$ )          | 0.63           | 4 ( $\pm 16$ )         | 0.01           | -                      | -              |

Mn-D.: mean difference; SD: standard deviation; LV: left ventricle; EDV: end-diastolic volume; EF: ejection fraction; RV: right ventricle.

**Table S4.** Number of measurements considered accurate with Level 1 and phases 1 and 2 of Level 2 automated post-processing.

|                                                     | Vendor 1 | Vendor 2 | Vendor 3 |          |          |          |
|-----------------------------------------------------|----------|----------|----------|----------|----------|----------|
| Parameter                                           | Level 1  |          |          |          |          |          |
| LVEDV                                               | 21 (53%) | 2 (5%)   | 26 (65%) |          |          |          |
| LVEF                                                | 24 (60%) | 15 (38%) | 21 (53%) |          |          |          |
| LV mass                                             | 1 (3%)   | 8 (20%)  | 8 (20%)  |          |          |          |
| RVEDV                                               | 11 (28%) | 4 (10%)  | -        |          |          |          |
| RVEF                                                | 16 (40%) | 8 (20%)  | -        |          |          |          |
| Level 2                                             |          |          |          |          |          |          |
| Relative-to-manual median standard error correction |          |          |          |          |          |          |
|                                                     | Before   | After    | Before   | After    | Before   | After    |
| LVEDV                                               | 21 (53%) | 39 (98%) | 3 (8%)   | 28 (70%) | 11 (28%) | 33 (83%) |
| LVEF                                                | 14 (35%) | 39 (98%) | 15 (28%) | 17 (43%) | 29 (73%) | 33 (83%) |
| LV mass                                             | 0 (0%)   | 28 (70%) | 10 (25%) | 12 (30%) | 12 (30%) | 15 (38%) |
| RVEDV                                               | 12 (30%) | 39 (98%) | 9 (23%)  | 19 (48%) | -        | -        |
| RVEF                                                | 3 (8%)   | 32 (80%) | 9 (23%)  | 17 (43%) | -        | -        |

Data presented as number (percentage). Level 2 automated results are subdivided between before (phase 1) and after (phase 2) software package-specific relative-to-manual median standard error correction. Results were considered accurate when the outcome differed 6% (the maximum interobserver disagreement) or less from the manual result.

LV: left ventricle; EDV: end-diastolic volume; EF: ejection fraction; RV: right ventricle.

**Table S5.** Intraclass correlation coefficient between Level 1 automated and manual tracing results for volumes and mass.

| Parameter | Vendor 1 | Vendor 2 | Vendor 3 |
|-----------|----------|----------|----------|
| LVEDV     | 0.949    | 0.899    | 0.911    |
| LVESV     | 0.874    | 0.641    | 0.743    |
| LV mass   | 0.928    | 0.670    | 0.657    |
| RVEDV     | 0.771    | 0.519    | -        |
| RVESV     | 0.829    | 0.300    | -        |

LV: left ventricle; EDV: end-diastolic volume; ESV: end-systolic volume; RV: right ventricle.

**Table S6.** Software package-specific relative-to-manual standard error in phase 1 of Level 2 automation.

| Parameter      | Vendor 1     | Vendor 2      | Vendor 3     |
|----------------|--------------|---------------|--------------|
| <b>LVEDV</b>   | -7 (-8, -6)  | 12 (9, 18)    | -9 (-11, -7) |
| <b>LVEF</b>    | 9 (6, 13)    | 2 (-10, 8)    | 4 (1, 6)     |
| <b>LV mass</b> | 21 (18, 29)  | 16 (7, 34)    | 3 (-18, 11)  |
| <b>RVEDV</b>   | -8 (-11, -7) | -14 (-20, -9) | -            |
| <b>RVEF</b>    | 12 (10, 15)  | 9 (-3, 18)    | -            |

Standard error reported as median percentage (interquartile range).

LV: left ventricle; EDV: end-diastolic volume; EF: ejection fraction; RV: right ventricle.

**Table S7.** Difference between phase 2 of Level 2 automated and manual results after relative-to-manual standard error correction.

|                    | <b>Vendor 1</b>                        | <b>Vendor 2</b>                        | <b>Vendor 3</b>                        |
|--------------------|----------------------------------------|----------------------------------------|----------------------------------------|
| <b>Parameter</b>   | <b>Mn-D. (<math>\pm 1.96SD</math>)</b> | <b>Mn-D. (<math>\pm 1.96SD</math>)</b> | <b>Mn-D. (<math>\pm 1.96SD</math>)</b> |
| <b>LVEDV (mL)</b>  | 0 ( $\pm 10$ )                         | 3 ( $\pm 22$ )                         | 0 ( $\pm 22$ )                         |
| <b>LVEF (%)</b>    | 0 ( $\pm 5$ )                          | -1 ( $\pm 15$ )                        | -1 ( $\pm 9$ )                         |
| <b>LV mass (g)</b> | 1 ( $\pm 15$ )                         | 1 ( $\pm 30$ )                         | -6 ( $\pm 40$ )                        |
| <b>RVEDV (mL)</b>  | -1 ( $\pm 13$ )                        | -3 ( $\pm 45$ )                        | -                                      |
| <b>RVEF (%)</b>    | 1 ( $\pm 4$ )                          | -1 ( $\pm 15$ )                        | -                                      |

Mn-D.: mean difference; SD: standard deviation; LV: left ventricle; EDV: end-diastolic volume; EF: ejection fraction; RV: right ventricle.
